# Supplementary material for: Student’s Self-Reported Experience of Soundscape: The Link between Noise, Psychological and Physical Well-Being
Source: MDPI journal article supplement (doi:10.3390/ijerph21010084), 2024-01-11
Supplement: s1 [file s1]

Table S1: The proportion of children reporting affective reactions to three types of sounds as a function of gender

| Other children yelling                       |       |        |       |        |       |                                        |
|----------------------------------------------|-------|--------|-------|--------|-------|----------------------------------------|
| Levels: 1=glad/safe to 5=sad/afraid          |       |        |       |        |       |                                        |
| Girls/boys                                   | 1     | 2      | 3     | 4      | 5     |                                        |
| Girls (n=182)                                | 2.2%* | 9.9%   | 72%   | 14.8%* | 1.1%  | <i>Fisher's exact</i> : $\rho = 0.043$ |
| Boys (n=177)                                 | 6.8%* | 14.1%  | 69.5% | 9.6%*  | 0%    |                                        |
| Total (n=359)                                | 4.5%  | 12%    | 70.8% | 12.3%  | 0.6%  |                                        |
| Levels: 1=kind/friendly to 5=angry/irritated |       |        |       |        |       |                                        |
| Girls/boys                                   | 1     | 2      | 3     | 4      | 5     |                                        |
| Girls (n=183)                                | 5.5%  | 9.8%   | 57.4% | 23.5%  | 3.8%  | NS                                     |
| Boys (n=175)                                 | 5.7%  | 17.1%  | 61.1% | 13.1%  | 2.9%  |                                        |
| Total (n=358)                                | 5.6%  | 13.4%  | 59.2% | 18.4%  | 3.4%  |                                        |
| Loud and intense sounds                      |       |        |       |        |       |                                        |
| Levels: 1=glad/safe to 5=sad/afraid          |       |        |       |        |       |                                        |
| Girls/boys                                   | 1     | 2      | 3     | 4      | 5     |                                        |
| Girls (n=177)                                | 2.8%* | 12.4%  | 56.5% | 26%*   | 2.3%  | Fisher's exact: $\rho = 0.001$         |
| Boys (n=171)                                 | 9.9%* | 15.8%  | 60.8% | 12.3%* | 1.2%  |                                        |
| Total (n=348)                                | 6.3%  | 14.1%  | 58.6% | 19.3%  | 1.7%  |                                        |
| Levels: 1=kind/friendly to 5=angry/irritated |       |        |       |        |       |                                        |
| Girls/boys                                   | 1     | 2      | 3     | 4      | 5     |                                        |
| Girls (n=180)                                | 2.2%  | 9.4%*  | 53.3% | 28.3%* | 6.7%  | $\chi^2(4) = 10.646, \rho = .031$      |
| Boys (n=172)                                 | 5.8%  | 17.4%* | 50.6% | 23.3%* | 2.9%  |                                        |
| Total (n=352)                                | 4%    | 13.4%  | 52%   | 25.9%  | 4.8%  |                                        |
| Scraping and screeching sounds               |       |        |       |        |       |                                        |
| Levels: 1=glad/safe to 5=sad/afraid          |       |        |       |        |       |                                        |
| Girls/boys                                   | 1     | 2      | 3     | 4      | 5     |                                        |
| Girls (n=183)                                | 4.9%  | 12.6%  | 49.7% | 30.1%  | 2.7%  | NS                                     |
| Boys (n=173)                                 | 8.7%  | 7.5%   | 56.1% | 26.6%  | 1.2%  |                                        |
| Total (n=356)                                | 6.7%  | 10.1%  | 52.8% | 28.4%  | 2%    |                                        |
| Levels: 1=kind/friendly to 5=angry/irritated |       |        |       |        |       |                                        |
| Girls/boys                                   | 1     | 2      | 3     | 4      | 5     |                                        |
| Girls (n=182)                                | 3.3%  | 9.3%   | 42.9% | 34.1%  | 10.4% | NS                                     |
| Boys (n=170)                                 | 8.2%  | 7.6%   | 46.5% | 30%    | 7.6%  |                                        |
| Total (n=352)                                | 5.7%  | 8.5%   | 44.6% | 32.1%  | 9.1%  |                                        |

\*Post-hoc tests are significant at the Bonferroni adjusted value of  $\rho < .005$

Table S2: The proportion of children reporting different levels of use of coping strategies (1: never - 5: always), as a function of school level (primary vs secondary).

| Leaving the noise                  |        |        |        |        |       |                                            |
|------------------------------------|--------|--------|--------|--------|-------|--------------------------------------------|
| Primary/secondary                  | 1      | 2      | 3      | 4      | 5     | $\chi^2(4, N = 384) = 31.556, \rho < .001$ |
| Primary (n=258)                    | 15.4%* | 14.2%  | 27.7%  | 22.9%* | 19.8% |                                            |
| Secondary (n=126)                  | 27.8%* | 38.9%* | 24.6%* | 6.3%*  | 2.4%  |                                            |
| Telling the teacher there is noise |        |        |        |        |       |                                            |
| Primary/secondary                  | 1      | 2      | 3      | 4      | 5     | Fisher's exact: $\rho = .002$              |
| Primary (n=255)                    | 25.2%* | 23.9%* | 14.9%* | 6.7%   | 2.4%  |                                            |
| Secondary (n=126)                  | 72.8%* | 13.5%* | 7.1%*  | 4%     | 1.6%  |                                            |
| Raising one's own voice            |        |        |        |        |       |                                            |
| Primary/secondary                  | 1      | 2      | 3      | 4      | 5     | NS                                         |
| Primary (n=253)                    | 15.4%  | 14.2%  | 27.7%  | 22.9%  | 3.6%  |                                            |
| Secondary (n=123)                  | 8.1%   | 10.6%* | 31.7%* | 34.1%  | 15.4% |                                            |

\*Post-hoc tests are significant at the Bonferroni adjusted value of  $\rho < .005$

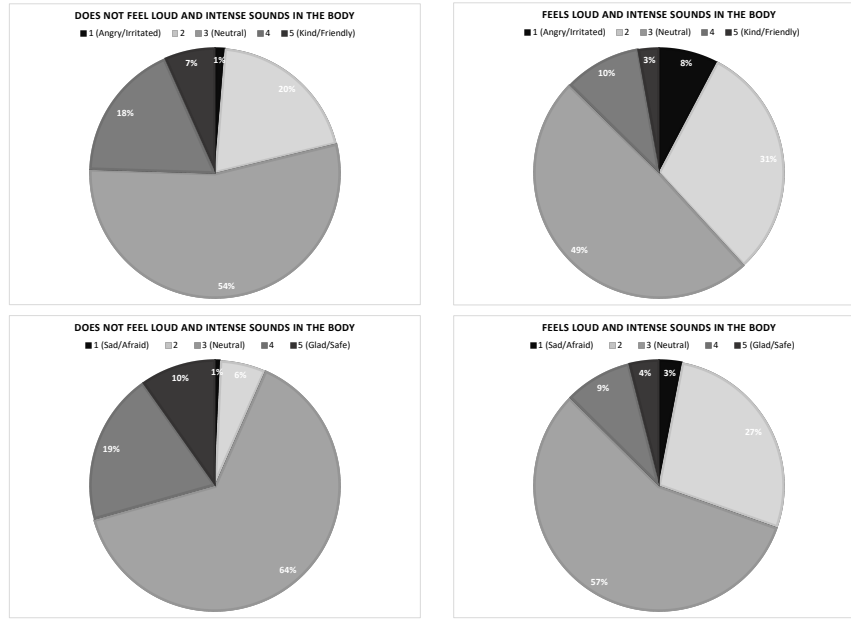

Figure S1: The proportion of children reporting different levels of affective reactions to loud and intense noise as a function of having or not bodily reactions to these sounds

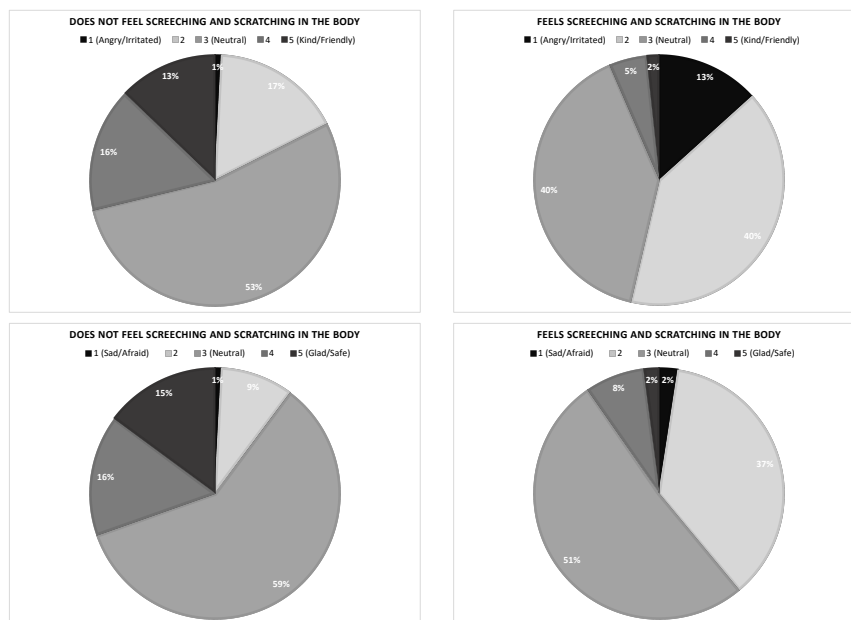

Figure S2: The proportion of children reporting different levels of affective re-actions to screeching scratching noise as a function of having or not bodily reactions to these sounds
